# Supplementary material for: Functional divergence of the sarcomeric myosin, MYH7b, supports species-specific biological roles
Source: PubMed Central journal article supplement (PMC9800208; doi:10.1016/j.jbc.2022.102657), 2022-11-09
Supplement: mmc1.pdf [file mmc1.pdf]

Supporting Information for

**Functional divergence of the sarcomeric myosin, MYH7b, supports species-specific biological roles**

**Authors**

Lindsey A. Lee<sup>1,2</sup>, Samantha K. Barrick<sup>3</sup>, Artur Meller<sup>4</sup>, Jonathan Walklate<sup>5</sup>, Jeffrey M. Lotthammer<sup>4</sup>, Jian Wei Tay<sup>2</sup>, W. Tom Stump<sup>3</sup>, Gregory Bowman<sup>4,6</sup>, Michael A. Geeves<sup>5</sup>, Michael J. Greenberg<sup>3</sup>, Leslie A. Leinwand<sup>1,2</sup>

**Author Affiliations**

<sup>1</sup>Molecular, Cellular, and Developmental Biology Department, Boulder, CO

<sup>2</sup>BioFrontiers Institute, Boulder, CO

<sup>3</sup>Department of Biochemistry and Molecular Biophysics, Washington University School of Medicine, St. Louis, MO

<sup>4</sup>The Center for Science and Engineering of Living Systems, Washington University in St. Louis, St. Louis, MO

<sup>5</sup>School of Biosciences, University of Kent, Canterbury, UK

<sup>6</sup>Department of Biochemistry and Biophysics, University of Pennsylvania, Philadelphia, PA.

## Supporting Information

This PDF includes:

**Figures S1 – S6.**

**Tables S3 – S7.**

Other supporting information for this manuscript include:

**Movie S1. Actin sliding motility of human  $\beta$ -MyHC S1.** Playback speed 7x.

**Movie S2. Actin sliding motility of human MYH7b S1.** Playback speed 7x.

**Movie S3. Actin sliding motility of python MYH7b S1.** Playback speed 7x.

**Table S1. Burmese python MS summary.** Table lists protein ID probability, percent coverage, exclusive unique peptides, exclusive unique spectrum, exclusive spectrum, total spectrum, and quantitative value for myosin heavy chains (HC) and myosin light chains (LC).

**Table S2. Ball python MS summary.** Table lists protein ID probability, percent coverage, exclusive unique peptides, exclusive unique spectrum, exclusive spectrum, total spectrum, and quantitative value for myosin heavy chains (HC) and myosin light chains (LC).

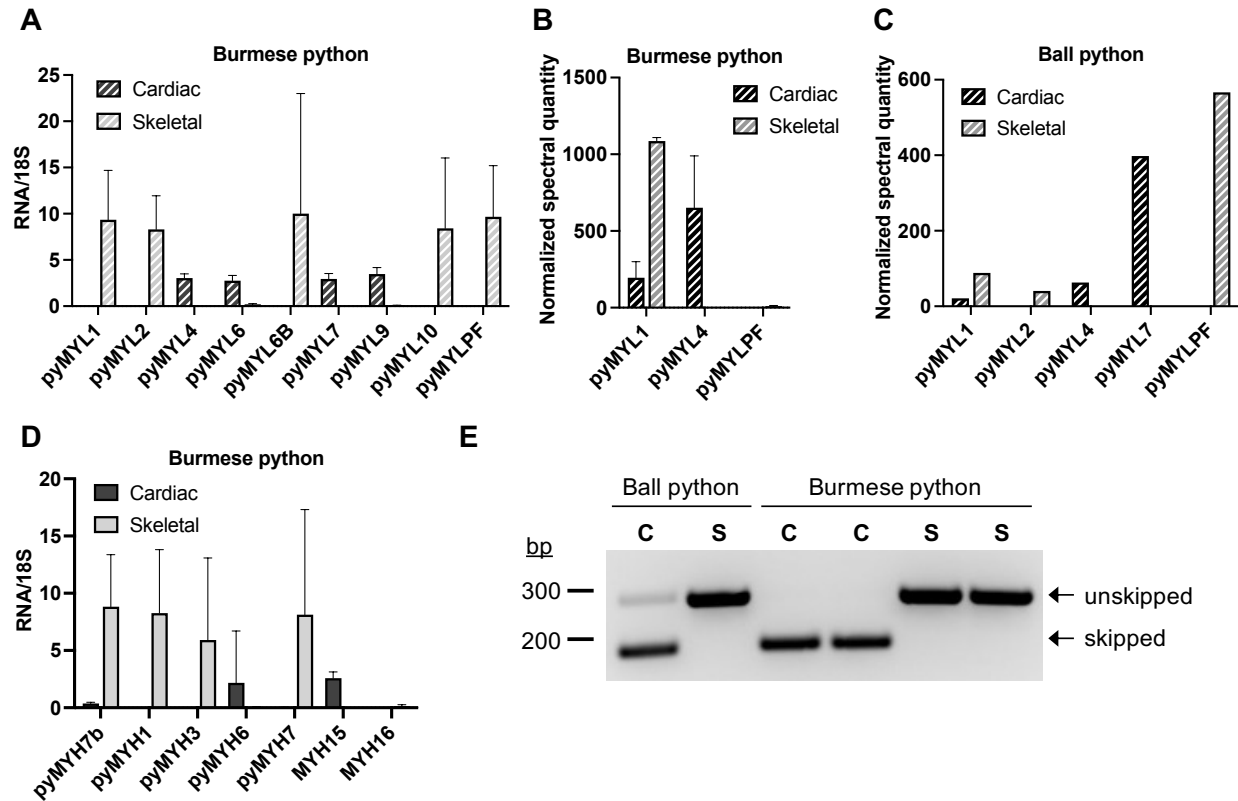

**Figure S1. Myosin heavy chain and myosin light chain isoform composition in Burmese and Ball pythons.** **A.** Relative RNA expression of Burmese python myosin light chain isoforms in cardiac and skeletal muscle measured by qPCR. **B.** Normalized spectral quantity of myosin light chains in Burmese python cardiac and skeletal muscle measured by mass spectrometry. pyMYL10 was detected in only one skeletal muscle sample at a normalized quantity of 11.4. **C.** Normalized spectral quantity of myosin light chains in Ball python cardiac and skeletal muscle measured by mass spectrometry. Note that without labeled internal standards, values from mass spectrometry are semi-quantitative. **D.** Relative RNA expression of myosin heavy chains in Burmese python cardiac and skeletal muscle measured by qPCR. Data in A-D represent mean  $\pm$  SD. **E.** RT-PCR analysis of MYH7b exon skipping using a forward primer directed to exon 5 and a reverse primer directed to exon 9, which amplifies exon 7 skipped (174 bp) and unskipped (271 bp) products. C = cardiac, S = Skeletal. Sample sizes for RNA expression analysis: Burmese python cardiac tissue n = 8 and skeletal tissue n=7 and Mass spectrometry: Burmese python n = 2, ball python n = 1. qPCR primers are listed in Table S3.

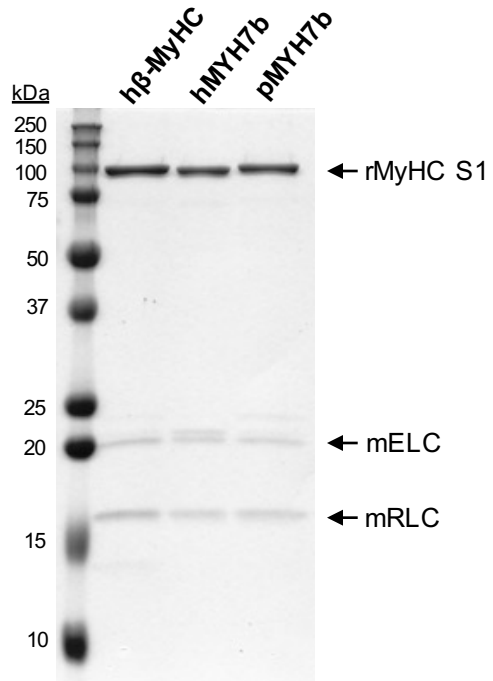

**Figure S2.** Representative gel of recombinant myosin heavy chain subfragment 1 (rMyHC S1) bound by C<sub>2</sub>C<sub>12</sub> endogenous mouse essential light chain (mELC) and mouse regulatory light chain (mRLC).

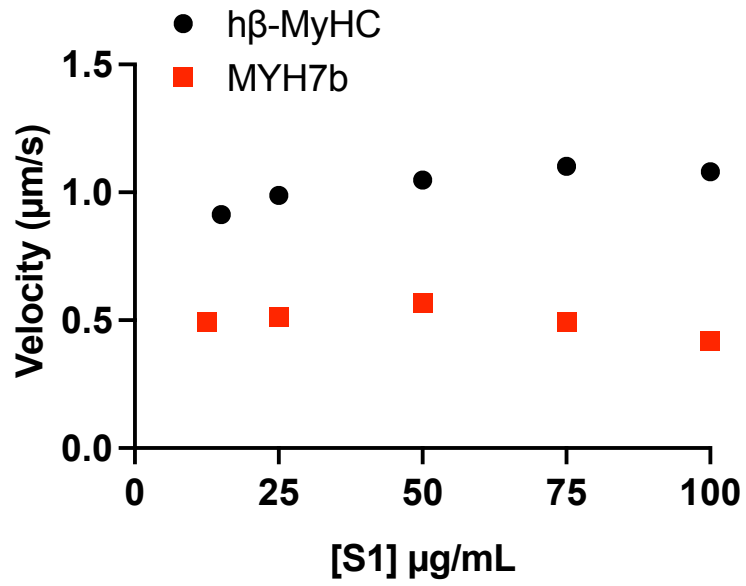

**Figure S3.** Actin sliding velocity as a function of myosin concentration demonstrate saturation at a concentration of 50  $\mu\text{g/mL}$  myosin S1.

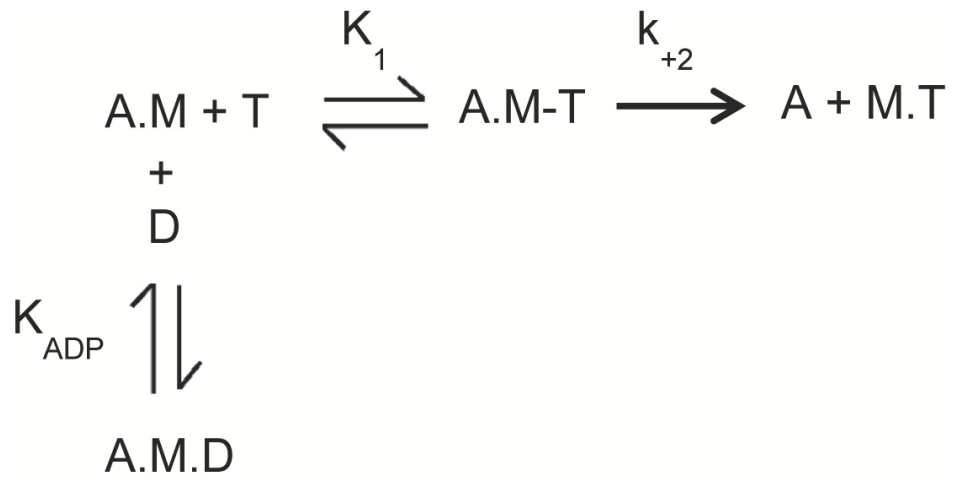

**Figure S4.** ATP or ADP binding to actomyosin leading to the dissociation of myosin from actin. A, actin; D, ADP; M, myosin/S1; T, ATP.

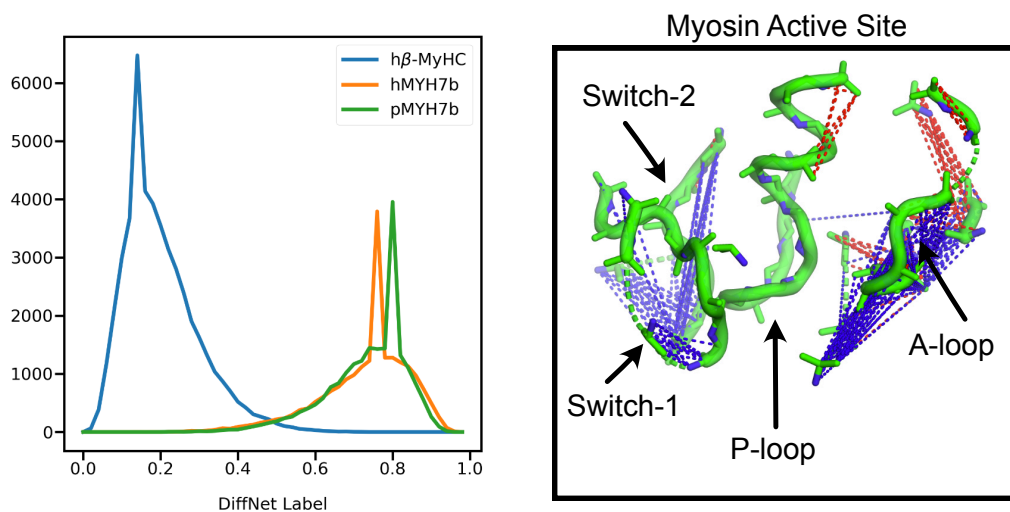

**Figure S5.** A self-supervised autoencoder called a DiffNet identifies differences between the MYH7b active site structural ensemble and that of  $\beta$ -MyHC. Left: The distribution of predicted labels following training shows that  $\beta$ -MyHC structures generally have small predicted labels while human MYH7b and python MYH7b have larger predicted labels. Right: The DiffNet label is highly correlated with pairwise distances between switch-2 and nearby residues as well as between distances with the purine A-loop. Blue dotted lines indicate distances that tend to be larger in the MYH7b ensembles than in the  $\beta$ -MyHC ensemble. Red dotted lines indicate distances that tend to be smaller in the MYH7b ensembles than in the  $\beta$ -MyHC ensemble.

A

Phosphate  
Release  
Intermediate  
(PDB: 4PJN)

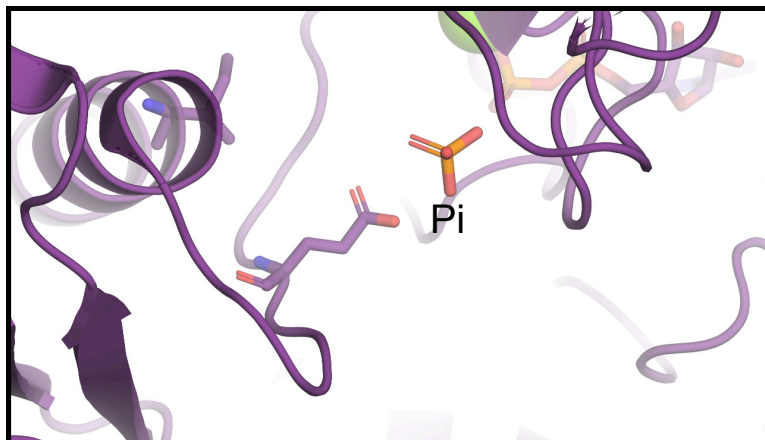

B

MSM Cluster  
Center

I481-E469  
distance: 12.4 Å

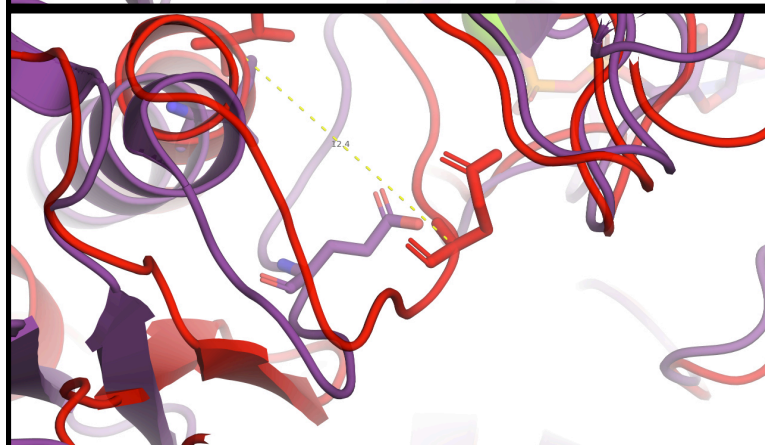

**Figure S6.** Structural overlay of a human MYH7b cluster center and a crystal structure of a myosin phosphate release intermediate shows that at large I481-E469 distances switch-2 is positioned in the phosphate release tunnel. The sidechain of E469 sterically clashes with the phosphate in the phosphate release intermediate but was removed for visual clarity.



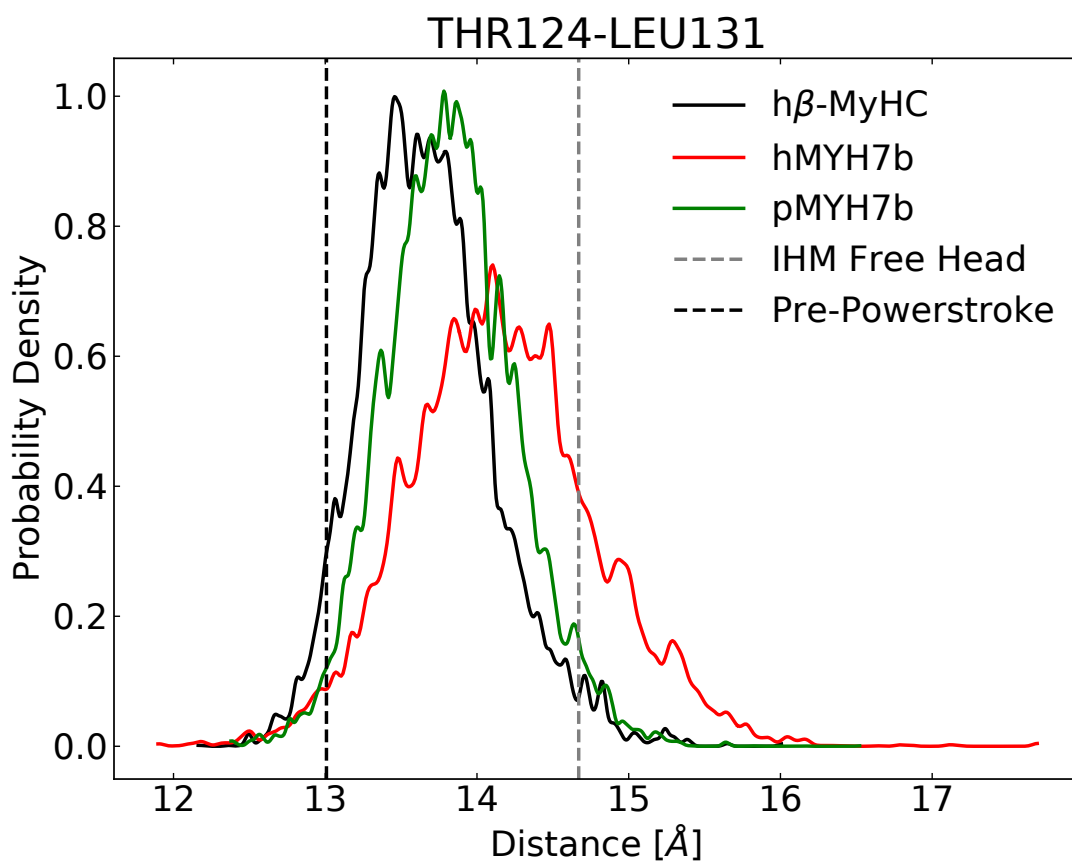

**Figure S7.** The purine-binding A-loop is more likely to adopt extended conformations in human MYH7b than human  $\beta$ -MyHC as measured by the distance between the C-alpha of T124 and the C-alpha of L131. Dotted lines indicate the value for this distance in a human  $\beta$ -MyHC pre-powerstroke structure (PDB: 5N6A) and the Free Head from the Interacting Heads Motif structure (PDB: 7MF3).

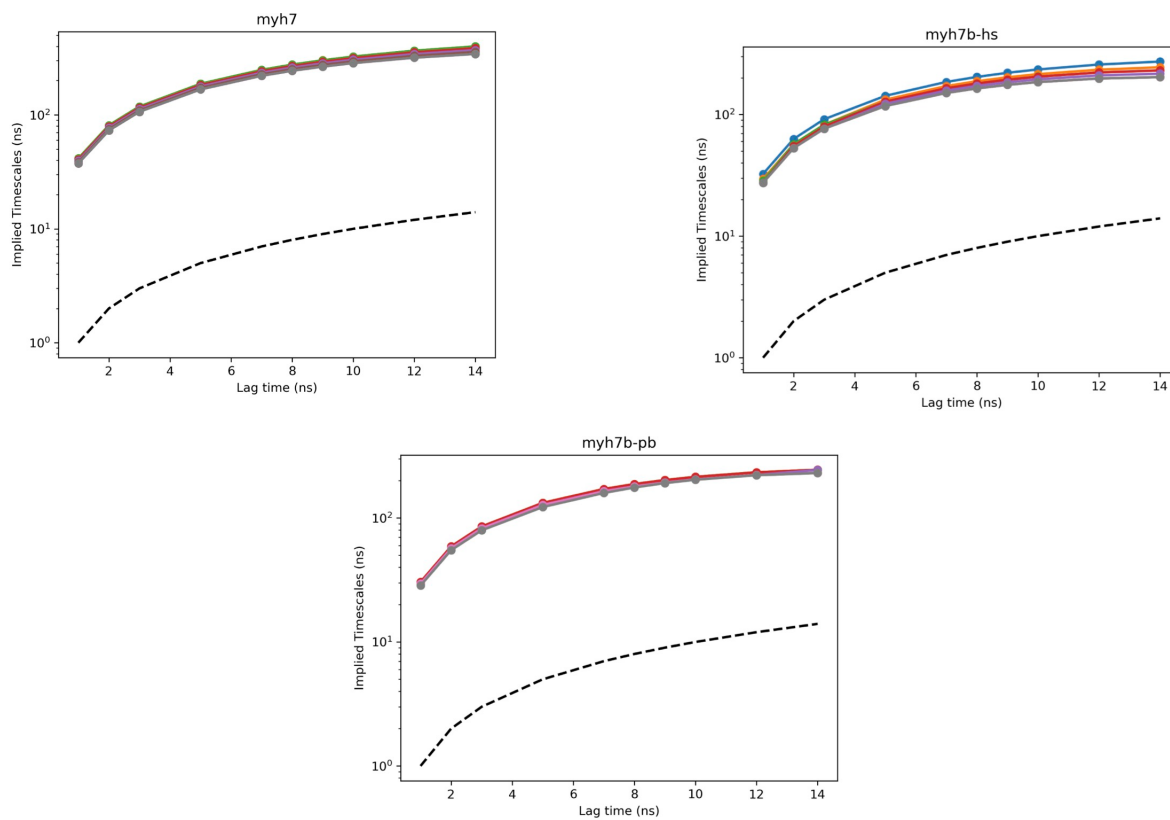

**Figure S8.** Implied timescales test show logarithmic convergence at  $\sim 7$  ns across the three isoforms simulated in this study. Myh7 = human  $\beta$ -MyHC, myh7b-hs = human MYH7b, myh7b-pb = python MYH7b.

**Table S3. qPCR primers**

| <b>Primer</b> | <b>Sequence</b>                  |
|---------------|----------------------------------|
| pyMYL1 F      | GTCTTTGACAAGGAGGGCAATG           |
| pyMYL1 R      | CTGCCCTTTCATCAGTTCTTCTAC         |
| pyMYL2 F      | GATACATTTGCAGCACTAGGACGC         |
| pyMYL2 R      | CTTTAAGTTTTTCTCCAAACATTGTCAAGAAC |
| pyMYL4 F      | TTGATCCCAAAGTGTGACGATTG          |
| pyMYL4 R      | TCATCTCTCCAGTTGGGGTCCTGT         |
| pyMYL5 F      | GACCCAGAAGCTAAAGGCAATA           |
| pyMYL5 R      | GGAGGACTGAAACATCTGATCG           |
| pyMYL6 F      | CTCGGAAGATCAGACCGCTGAGTTC        |
| pyMYL6 R      | GGCCCTCATCACATCTCCACAC           |
| pyMYL6B F     | TCGACCTCTCCAAAGTGGTGATTG         |
| pyMYL6B R     | CCTCATCACATCTCCACTGGC            |
| pyMYL7 F      | CTGGCTATGTCAACAAAGATGAGTTTA      |
| pyMYL7 R      | CAATGTTTCCAGCCACATCCATG          |
| pyMYL9 F      | ACGAGGAGGCCACAGGTTTC             |
| pyMYL9 R      | CTTGTC AATTGGAGCTTCTCGATACATCTC  |
| pyMYL10 F     | CGGATTCAGGAATTTAAAGAGGCATT       |
| pyMYL10 R     | GCTCTTCCATTTTAAACATTCATACGGC     |
| pyMYLPF F     | TTGGGGAGAAGCTGAAGGGTG            |
| pyMYLPF R     | CACTGGGTGGTCAAGAGTTCTTC          |
| pyMYH1 F      | GTTAAGAAAGAAGGTGGAGAGTCTGC       |
| pyMYH1 R      | GTAGATCATCCAGGCTGCATAAC          |
| pyMYH3 F      | GCAAAAAACAGGCATGAAGGGGAC         |
| pyMYH3 R      | AAAACGGGAGGAGTTGTCATTCC          |
| pyMYH6 F      | GCGTACCAATACATGTTGACAGATCG       |
| pyMYH6 R      | CGATACTGGCAAAGTACTGGATAACTCG     |
| pyMYH7 F      | GTATCAGCCTTGCACAGGGAGA           |
| pyMYH7 R      | CAAAGTGGGGATGGGTGGAA             |
| pyMYH7b F     | CTGACCTCATCAAGGGGTTGC            |
| pyMYH7b R     | CCTACCGCATACACCACCTGAT           |
| pyMYH15 F     | GAGCTGATGGCAACTGATCAAGC          |
| pyMYH15 R     | AGTGAGTTTGTAGGCACCGT             |
| pyMYH16 F     | GCTGGGCCTGATACTGATCC             |
| pyMYH16 R     | ATTCCTCCTCTTGCCGAGC              |
| py18S F       | GCCGCTAGAGGTGAAATTCTTG           |
| py18S R       | CTTTCGCTCTGGTCCGTCTT             |

**Table S4. Actin-activated ATPase results summary**

| Protein         | $k_{cat}$ ( $s^{-1}$ ) | $k_{cat}$ SD ( $s^{-1}$ ) | $K_M$ ( $\mu M$ ) | $K_M$ SD ( $\mu M$ ) | Basal ATPase rate ( $s^{-1}$ ) | Basal ATPase rate SD ( $s^{-1}$ ) | $k_{cat}/K_M$ ( $s^{-1} \mu M^{-1}$ ) | $k_{cat}/K_M$ SD ( $s^{-1} \mu M^{-1}$ ) | Biological n (purifications) | Technical n (curves) |
|-----------------|------------------------|---------------------------|-------------------|----------------------|--------------------------------|-----------------------------------|---------------------------------------|------------------------------------------|------------------------------|----------------------|
| h $\beta$ -MyHC | 1.57                   | 0.18                      | 93.4              | 56.5                 | 0.110                          | 0.018                             | 0.025                                 | 0.015                                    | 5                            | 9                    |
| hMYH7b          | 0.80*                  | 0.08                      | 35.9*             | 9.8                  | 0.109                          | 0.040                             | 0.023                                 | 0.006                                    | 6                            | 9                    |
| pMYH7b          | 0.60* <sup>‡</sup>     | 0.08                      | 79.3              | 16.1                 | 0.067                          | 0.034                             | 0.008* <sup>‡</sup>                   | 0.003                                    | 4                            | 5                    |

Statistical significance ( $p < 0.05$  by one-way ANOVA using Tukey's multiple comparisons test) \*compared to h $\beta$ -MyHC, <sup>‡</sup>compared to hMYH7b.

**Table S5. *in vitro* motility results summary**

| <b>Protein</b>  | <b>Velocity<br/>(<math>\mu\text{m/s}</math>)</b> | <b>Velocity SD<br/>(<math>\mu\text{m/s}</math>)</b> | <b>Biological n<br/>(purifications)</b> | <b>Technical n<br/>(movies)</b> | <b># Filaments</b> |
|-----------------|--------------------------------------------------|-----------------------------------------------------|-----------------------------------------|---------------------------------|--------------------|
| h $\beta$ -MyHC | 1.017                                            | 0.076                                               | 3                                       | 11                              | 254                |
| hMYH7b          | 0.597*                                           | 0.057                                               | 3                                       | 12                              | 242                |
| pMYH7b          | 0.536*                                           | 0.050                                               | 3                                       | 11                              | 178                |

Statistical significance ( $p < 0.05$  by one-way ANOVA using Tukey's multiple comparisons test)  
\*compared to h $\beta$ -MyHC.

**Table S6. Stopped-flow kinetics results summary**

| Protein | $k_{+2}$ (s <sup>-1</sup> ) | $k_{+2}$ SD (s <sup>-1</sup> ) | $K_1k_{+2}$ (μM <sup>-1</sup> s <sup>-1</sup> ) | $K_1k_{+2}$ SD (μM <sup>-1</sup> s <sup>-1</sup> ) | 1/ $K_1$ (μM) | 1/ $K_1$ SD (μM) | $K_{ADP}$ (μM) | $K_{ADP}$ SD (μM) | Technical n (curves) |
|---------|-----------------------------|--------------------------------|-------------------------------------------------|----------------------------------------------------|---------------|------------------|----------------|-------------------|----------------------|
| hMYH7b  | 520.7                       | 7.0                            | 6.7                                             | 1.4                                                | 79.8          | 17.7             | 120.7          | 29.5              | 2                    |
| pMYH7b  | 181.2*                      | 6.9                            | 1.2*                                            | 0.0                                                | 157.3*        | 11.5             | 17.0*          | 3.2               | 2                    |

Statistical significance (\*p < 0.05 by unpaired t-test).

**Table S7. Single ATP turnover results summary**

| Protein         | % DRX (fast)       | % SRX (slow)       | % DRX and SRX SD | $k_{fast}$ rate (s <sup>-1</sup> ) | $k_{fast}$ rate SD (s <sup>-1</sup> ) | $k_{slow}$ rate (s <sup>-1</sup> ) | $k_{slow}$ rate SD (s <sup>-1</sup> ) | Biological n (purifications) | Technical n (curves) |
|-----------------|--------------------|--------------------|------------------|------------------------------------|---------------------------------------|------------------------------------|---------------------------------------|------------------------------|----------------------|
| h $\beta$ -MyHC | 85.6               | 14.4               | 7.3              | 0.0604                             | 0.0130                                | 0.00152                            | 0.00078                               | 4                            | 12                   |
| hMYH7b          | 17.1*              | 82.9*              | 3.7              | 0.0361*                            | 0.0171                                | 0.00334*                           | 0.00066                               | 4                            | 10                   |
| pMYH7b          | 53.6* <sup>‡</sup> | 46.4* <sup>‡</sup> | 13.3             | 0.0208* <sup>‡</sup>               | 0.0061                                | 0.00371*                           | 0.00061                               | 5                            | 10                   |

Statistical significance ( $p < 0.05$  by one-way ANOVA using Tukey's multiple comparisons test) \*compared to h $\beta$ -MyHC, <sup>‡</sup>compared to hMYH7b.
